# Supplementary material for: Multicentre feasibility of multiple-breath washout in preschool children with cystic fibrosis and other lung diseases
Source: PubMed Central journal article supplement — ERJ Open Res. 2020 Oct 26;6(4):00408-2020. doi: 10.1183/23120541.00408-2020 (PMC7682699; doi:10.1183/23120541.00408-2020), 2020-10-26
Supplement: 00408-2020.SUPPLEMENT.pdf [file 00408-2020.SUPPLEMENT.pdf]

1 **Multicenter Feasibility of Multiple-Breath Washout in Preschool**  
2 **Children with Cystic Fibrosis and Other Lung Diseases**

3  
4 Mirjam Stahl, Cornelia Joachim, Ines Kirsch, Tatjana Uselmann, Yin Yu, Nadine Alfeis,  
5 Christiane Berger, Rebecca Minso, Isa Rudolf, Cornelia Stolpe, Xenia Bovermann, Lena  
6 Liboschik, Alena Steinmetz, Dunja Tennhardt, Friederike Dörfler, Jobst Röhmel, Klaudia  
7 Unorji-Frank, Claudia Rückes-Nilges, Bianca von Stoutz, Lutz Naehrlich, Matthias V. Kopp,  
8 Anna-Maria Dittrich, Olaf Sommerburg, Marcus A. Mall

9  
10  
11 **Online Supplement**  
12  
13  
14

## 1 **Supplementary Methods**

### 2 **Study population**

3 In all participating children with cystic fibrosis (CF), the diagnosis was based on a positive  
4 family history, positive CF newborn screening, or clinical symptoms characteristic of CF and  
5 confirmed by sweat chloride concentrations > 60 mmol/mL and/or cystic fibrosis  
6 transmembrane conductance regulator (*CFTR*) mutation analysis (Supplementary Table E1)  
7 according to established diagnostic criteria as previously described [1, 2]. Multiple-breath  
8 washout (MBW) measurements were performed as part of diagnostic work up in children with  
9 CF and those with non-CF pulmonary disease (history of recurrent wheeze (n=9), primary  
10 ciliary dyskinesia (PCD) (n=3), status post esophageal atresia with tracheo-esophageal  
11 fistula (n=1)). Children with lung disease were excluded from the study if they had a  
12 respiratory infection within 2 weeks prior to investigation. *Pseudomonas aeruginosa* status  
13 was determined from microbiological results of throat swabs and/or sputum samples at the  
14 time of investigation and the medical history. In addition, a control group of children without  
15 evidence of lung disease based on a detailed symptom and history questionnaire, review of  
16 the medical records and physical examination by a pediatric pulmonologist, was  
17 prospectively recruited from children of co-workers of the different study sites. Children were  
18 excluded from this control group when they had cardiac, respiratory, or neuromuscular  
19 disease or a history of prematurity, respiratory hospitalization, wheezing, chronic cough,  
20 asthma, use of anti-asthmatic drugs, or respiratory infection within 3 weeks prior to  
21 investigation. Reference values of healthy children in Germany were used to derive z-scores  
22 for weight, height and BMI [3, 4].

23

### 24 **Multiple-breath washout test**

25 Nitrogen (N<sub>2</sub>)-MBW investigations in preschool children were established at the Airway  
26 Research Center North (ARCN), the Biomedical Research in Endstage and Obstructive Lung  
27 Disease (BREATH) and the Translational Lung Research Center Heidelberg (TLRC) before  
28 the start of this study and got established at the Universities of Giessen and Marburg Lung

1 Center (UGMLC) and the Charité – Universitätsmedizin Berlin as part of this study [5, 6].  
2 Children were awake and sitting upright during MBW testing performed with a commercially  
3 available mainstream ultrasonic flowmeter (Exhalyzer D, Eco Medics, Duernten, Switzerland)  
4 with N<sub>2</sub> as tracer gas as previously described [6-8]. Dead space reducers (DSR) were used  
5 according to child's body size and manufacturer's recommendations (DSR set 1 <15 kg,  
6 DSR set 2 ≥15 to ≤35 kg, and DSR set 3 >35 kg body weight) with all children breathing  
7 evenly through a hard mouthpiece while wearing a nose clip. The mouthpiece is the identical  
8 one used in older subjects at our centers. Spiroware 3.2.1 (client 21679/ server 21680;  
9 EcoMedics, Duernten, Switzerland) was used for data collection and analysis. A minimum of  
10 five consecutive regular breaths was collected before starting the washout by switching from  
11 inspiration of room air to 100% oxygen (O<sub>2</sub>). The measurement was finished once N<sub>2</sub> was  
12 below 2.5% of the N<sub>2</sub> starting concentration in five consecutive breaths. Every investigation  
13 aimed at a minimum of two acceptable measurements to be rated successful. All washout  
14 curves were saved, but only technically acceptable washout curves that met previously  
15 defined quality criteria were used to derive the LCI from a minimum of two measurements [9-  
16 11]. Repeated investigation of the same patient at different time points was allowed. One  
17 MBW investigation could consist of numerous measurements with a minimum of one  
18 measurement while at least two successful measurements were needed for a successful  
19 investigation.

20

## 21 **Technical requirements, training and quality control**

### 22 ***Pre-study tech-check***

23 Inclusion in the study was possible for partner sites with an Exhalyzer D (Eco Medics,  
24 Duernten, Switzerland) with equipment available. The CF centers at the five DZL sites and  
25 one associated partner site were invited to submit feasibility questionnaires for the evaluation  
26 of technical specifications of MBW hardware and software versions installed. Specifications  
27 were reviewed within four weeks and five sites were selected as study sites that had an  
28 Exhalyzer D (Eco Medics, Duernten, Switzerland) with equipment available. Following this

1 selection process, a datasheet containing the standardized MBW protocol and the data  
2 acquisition and analysis software version installed at the coordinating center in Heidelberg  
3 (see above) were distributed and the study team at each site was instructed to install this  
4 software version on their MBW PC.

5

### 6 ***Pre-study training session***

7 A dedicated training session on performance of MBW according to the study protocol and on  
8 systematic washout interpretation was held at the coordinating site prior to the start of the  
9 study. Members of all participating sites attended such a teaching session. A supervised  
10 MBW investigation was carried out by the trainees to ensure standardized execution and  
11 quality.

12

### 13 ***Implementation of the MBW protocol at study sites***

14 Trained members of the study teams of each site locally implemented the MBW standard  
15 operating procedure including calibration of the MBW machine, performing standardized  
16 MBW measurements in preschool children, as well as organizational procedures and  
17 management of acquired data such as pseudonymization and transfer of MBW files for  
18 central evaluation to the coordinating center. The previously installed MBW software was  
19 checked and corrections were made as necessary.

20

### 21 ***Data management and central assessment***

22 A diagnostically evaluation of MBW tracings with report to the parents was performed by a  
23 pediatrician trained in MBW performance and analysis of the respective study site.  
24 Pseudonymized MBW files were sent to the coordinating center for central quality control,  
25 evaluation and statistical analysis. The central MBW reader (MS) provided feedback to the  
26 study sites to improve their experience in interpretation of diagnostic MBW investigations.

27

28

## 1 References

- 2 1. Hirtz S, Gonska T, Seydewitz HH, Thomas J, Greiner P, Kuehr J, Brandis M, Eichler I,  
3 Rocha H, Lopes AI, Barreto C, Ramalho A, Amaral MD, Kunzelmann K, Mall M. CFTR  
4 Cl- channel function in native human colon correlates with the genotype and phenotype  
5 in cystic fibrosis. *Gastroenterology* 2004; 127(4): 1085-1095.
- 6 2. Rosenstein BJ, Cutting GR. The diagnosis of cystic fibrosis: a consensus statement.  
7 Cystic Fibrosis Foundation Consensus Panel. *J Pediatr* 1998; 132(4): 589-595.
- 8 3. Brandt I, Reinken L. [The growth rate of healthy children in the first 16 years: Bonn-  
9 Dortmund longitudinal developmental study]. *Klin Padiatr* 1988; 200(6): 451-456.
- 10 4. Kromeyer-Hauschild K, Wabitsch M, Geller F, Ziegler A, Geiß HC, Hesse V, v. Hippel,  
11 Jaeger U, Johnsen D, Kiess W, Korte W, Kunze D, Menner K, Müller M, Niemann-  
12 Pilatus A, Remer Th, Schaefer F, Wittchen HU, Zabransky S, Zellner K, J H. Perzentile  
13 für den Body Mass Index für das Kindes- und Jugendalter unter Heranziehung  
14 verschiedener deutscher Stichproben. *Monatschr Kinderh* 2001; 149(8): 807-818.
- 15 5. Stahl M, Joachim C, Wielputz MO, Mall MA. Comparison of lung clearance index  
16 determined by washout of N<sub>2</sub> and SF<sub>6</sub> in infants and preschool children with cystic  
17 fibrosis. *J Cyst Fibros* 2019; 18(3): 399-406.
- 18 6. Stahl M, Wielputz MO, Graeber SY, Joachim C, Sommerburg O, Kauczor HU,  
19 Puderbach M, Eichinger M, Mall MA. Comparison of Lung Clearance Index and  
20 Magnetic Resonance Imaging for Assessment of Lung Disease in Children with Cystic  
21 Fibrosis. *Am J Respir Crit Care Med* 2017; 195(3): 349-359.
- 22 7. Stanojevic S, Davis SD, Retsch-Bogart G, Webster H, Davis M, Johnson RC, Jensen  
23 R, Pizarro ME, Kane M, Clem CC, Schornick L, Subbarao P, Ratjen FA. Progression of  
24 Lung Disease in Preschool Patients with Cystic Fibrosis. *Am J Respir Crit Care Med*  
25 2017; 195(9): 1216-1225.
- 26 8. Anagnostopoulou P, Latzin P, Jensen R, Stahl M, Harper A, Yammine S, Usemann J,  
27 Foong RE, Spycher B, Hall GL, Singer F, Stanojevic S, Mall M, Ratjen F, Ramsey KA.  
28 Normative data for multiple breath washout outcomes in school-aged Caucasian  
29 children. *Eur Respir J* 2019.
- 30 9. Jensen R, Stanojevic S, Klingel M, Pizarro ME, Hall GL, Ramsey K, Foong R,  
31 Saunders C, Robinson PD, Webster H, Hardaker K, Kane M, Ratjen F. A Systematic  
32 Approach to Multiple Breath Nitrogen Washout Test Quality. *PLoS One* 2016; 11(6):  
33 e0157523.
- 34 10. Robinson PD, Latzin P, Ramsey KA, Stanojevic S, Aurora P, Davis SD, Gappa M, Hall  
35 GL, Horsley A, Jensen R, Lum S, Milla C, Nielsen KG, Pittman JE, Rosenfeld M,  
36 Singer F, Subbarao P, Gustafsson PM, Ratjen F, Pediatrics ATSAo. Preschool

- 1 Multiple-Breath Washout Testing. An Official American Thoracic Society Technical  
2 Statement. *Am J Respir Crit Care Med* 2018; 197(5): e1-e19.
- 3 11. Robinson PD, Latzin P, Verbanck S, Hall GL, Horsley A, Gappa M, Thamrin C, Arets  
4 HG, Aurora P, Fuchs SI, King GG, Lum S, Macleod K, Paiva M, Pillow JJ,  
5 Ranganathan S, Ratjen F, Singer F, Sonnappa S, Stocks J, Subbarao P, Thompson  
6 BR, Gustafsson PM. Consensus statement for inert gas washout measurement using  
7 multiple- and single- breath tests. *Eur Respir J* 2013; 41(3): 507-522.

1 **Supplementary Table E1.** Summary of *CFTR* genotypes according to pancreatic status of  
 2 children with CF

| Pancreatic insufficient |                    | Pancreatic sufficient |                    |
|-------------------------|--------------------|-----------------------|--------------------|
| <i>CFTR</i> Genotype    | Number of subjects | <i>CFTR</i> Genotype  | Number of subjects |
| F508del/F508del         | 35                 | 3120+1G>A/D110H       | 1                  |
| F508del/G542X           | 2                  | I507del/3849+10kbC->T | 1                  |
| F508del/1717-1G->A      | 1                  |                       |                    |
| F508del/2184delA        | 1                  |                       |                    |
| F508del/CFTRdele2,3     | 1                  |                       |                    |
| F508del/I507del         | 1                  |                       |                    |
| F508del/N1303K          | 1                  |                       |                    |
| F508del/R553X           | 1                  |                       |                    |
| E92X/R347P              | 1                  |                       |                    |

3 Exocrine pancreatic function was determined by levels of fecal elastase in stool with  $\geq$   
 4 200 $\mu$ g/g stool as cut-off for pancreatic sufficiency.

1 **Supplementary Table E2.** Success rates of MBW investigations in awake preschool  
 2 children

| Cohort                    | Center | Number of                         | Number of                               | Number of                                | At least 1                          | At least 2                           |
|---------------------------|--------|-----------------------------------|-----------------------------------------|------------------------------------------|-------------------------------------|--------------------------------------|
|                           |        | performed<br>investigations,<br>n | performed<br>measurements,<br>mean ± SD | successful<br>measurements,<br>mean ± SD | successful<br>measurement,<br>n (%) | successful<br>measurements,<br>n (%) |
| All                       | ARCN   | 17                                | 4.0 ± 1.0                               | 2.5 ± 0.6                                | 17 (100.0)                          | 16 (94.1)                            |
|                           | BREATH | 21                                | 3.7 ± 1.8*                              | 1.9 ± 0.8                                | 19 (90.5)                           | 17 (81.0)                            |
|                           | TLRC   | 24                                | 3.8 ± 1.8*                              | 2.0 ± 0.8                                | 22 (91.7)                           | 21 (87.5)                            |
|                           | UGMLC  | 12                                | 6.2 ± 2.3                               | 2.1 ± 1.1                                | 11 (91.7)                           | 9 (75.0)                             |
|                           | Berlin | 17                                | 4.5 ± 2.4                               | 2.1 ± 1.4                                | 13 (76.5)                           | 12 (70.6)                            |
| Controls                  | ARCN   | 3                                 | 3.7 ± 0.6                               | 2.3 ± 0.6                                | 3 (100.0)                           | 3 (100.0)                            |
|                           | BREATH | 5                                 | 5.2 ± 2.8                               | 2.0 ± 0.7                                | 5 (100.0)                           | 4 (80.0)                             |
|                           | TLRC   | 3                                 | 3.0 ± 1.0                               | 2.0 ± 0.0                                | 3 (100.0)                           | 3 (100.0)                            |
|                           | UGMLC  | 1                                 | 7                                       | 3                                        | 1 (100.0)                           | 1 (100.0)                            |
|                           | Berlin | 3                                 | 5.0 ± 2.0                               | 3.0 ± 1.0                                | 3 (100.0)                           | 3 (100.0)                            |
| CF                        | ARCN   | 4                                 | 4.8 ± 1.5                               | 2.0 ± 0.8                                | 4 (100.0)                           | 3 (75.0)                             |
|                           | BREATH | 16                                | 3.2 ± 1.2*                              | 1.9 ± 0.9                                | 14 (87.5)                           | 13 (81.3)                            |
|                           | TLRC   | 20                                | 3.9 ± 2.0                               | 2.0 ± 0.9                                | 18 (90.0)                           | 17 (85.0)                            |
|                           | UGMLC  | 11                                | 6.1 ± 2.3                               | 2.0 ± 1.1                                | 10 (90.9)                           | 8 (72.7)                             |
|                           | Berlin | 12                                | 4.6 ± 2.7                               | 1.9 ± 1.4                                | 9 (75.0)                            | 8 (66.7)                             |
| Other<br>lung<br>diseases | ARCN   | 10                                | 3.8 ± 0.8                               | 2.7 ± 0.5                                | 10 (100.0)                          | 10 (100.0)                           |
|                           | TLRC   | 1                                 | 4                                       | 3                                        | 1 (100.0)                           | 1 (100.0)                            |
|                           | Berlin | 2                                 | 3.0 ± 1.4                               | 1.5 ± 2.1                                | 1 (50.0)                            | 1 (50.0)                             |

3

4 Definition of abbreviations: MBW, multiple-breath washout. SD, standard deviation. CF,  
 5 cystic fibrosis. ARCN, CF Center at Airway Research Center North. BREATH, CF Center at  
 6 Biomedical Research in Endstage and Obstructive Lung Disease Hannover. TLRC, CF



- 1 Center at Translational Lung Research Center Heidelberg. UGMLC, CF Center at
- 2 Universities of Giessen and Marburg Lung Center. Berlin, CF Center at Charité -
- 3 Universitätsmedizin Berlin. \* $P < 0.05$  vs. UGMLC.

1 **Supplementary Table E3.** Success rates of only the first MBW investigation in this study in  
 2 awake preschool children

| Cohort                    | Center | Number of                         | Number of                               | Number of                                | Number of                              |
|---------------------------|--------|-----------------------------------|-----------------------------------------|------------------------------------------|----------------------------------------|
|                           |        | performed<br>investigations,<br>n | performed<br>measurements,<br>mean ± SD | successful<br>measurements,<br>mean ± SD | successful<br>investigations,<br>n (%) |
| All                       | ARCN   | 17                                | 4.0 ± 1.0                               | 2.5 ± 0.6                                | 16 (94.1)                              |
|                           | BREATH | 18                                | 3.8 ± 1.9*                              | 1.8 ± 0.9                                | 14 (77.8)                              |
|                           | TLRC   | 21                                | 3.8 ± 1.9*                              | 2.1 ± 0.9                                | 19 (90.5)                              |
|                           | UGMLC  | 4                                 | 7.8 ± 3.0                               | 1.8 ± 1.3                                | 3 (75.0)                               |
|                           | Berlin | 14                                | 4.7 ± 2.6                               | 2.1 ± 1.4                                | 10 (71.4)                              |
| Controls                  | ARCN   | 3                                 | 3.7 ± 0.6                               | 2.3 ± 0.6                                | 3 (100.0)                              |
|                           | BREATH | 5                                 | 5.2 ± 2.8                               | 2.0 ± 0.7                                | 4 (80.0)                               |
|                           | TLRC   | 3                                 | 3.0 ± 1.0                               | 2.0 ± 0.0                                | 3 (100.0)                              |
|                           | UGMLC  | 1                                 | 7                                       | 3                                        | 1 (100.0)                              |
|                           | Berlin | 3                                 | 5.0 ± 2.0                               | 3.0 ± 1.0                                | 3 (100.0)                              |
| CF                        | ARCN   | 4                                 | 4.8 ± 1.5                               | 2.0 ± 0.8                                | 3 (75.0)                               |
|                           | BREATH | 13                                | 3.3 ± 1.3*                              | 1.8 ± 0.9                                | 10 (76.9)                              |
|                           | TLRC   | 17                                | 3.9 ± 2.1                               | 2.0 ± 0.9                                | 15 (88.2)                              |
|                           | UGMLC  | 3                                 | 8.0 ± 3.6                               | 1.3 ± 1.2                                | 2 (66.7)                               |
|                           | Berlin | 9                                 | 5.0 ± 3.0                               | 2.0 ± 1.4                                | 6 (66.7)                               |
| Other<br>lung<br>diseases | ARCN   | 10                                | 3.8 ± 0.8                               | 2.7 ± 0.5                                | 10 (100.0)                             |
|                           | TLRC   | 1                                 | 4                                       | 3                                        | 1 (100.0)                              |
|                           | Berlin | 2                                 | 3.0 ± 1.4                               | 1.5 ± 2.1                                | 1 (50.0)                               |

3 Definition of abbreviations: MBW, multiple-breath washout. SD, standard deviation. CF,  
 4 cystic fibrosis. ARCN, CF Center at Airway Research Center North. BREATH, CF Center at  
 5 Biomedical Research in Endstage and Obstructive Lung Disease Hannover. TLRC, CF  
 6 Center at Translational Lung Research Center Heidelberg. UGMLC, CF Center at

- 1 Universities of Giessen and Marburg Lung Center. Berlin, CF Center at Charité -
- 2 Universitätsmedizin Berlin. \* $P < 0.05$  vs. UGMLC.

**Supplementary Table E4.** Distribution of LCI between study sites in preschool children

| Diagnosis           |                                                    | Total       | ARCN       | BREATH     | TLRC       | UGMLC      | Berlin     |
|---------------------|----------------------------------------------------|-------------|------------|------------|------------|------------|------------|
| Control             | Number of children                                 | 14          | 3          | 4          | 3          | 1          | 3          |
|                     | LCI, median (range) <sup>†</sup>                   | 7.3         | 7.1        | 7.4        | 6.7        | 7.3        | 7.8        |
|                     |                                                    | (6.5–8.3)   | (6.8–7.8)  | (6.7–7.8)  | (6.5–7.5)  |            | (7.2–8.3)  |
|                     | LCI <sub>CV</sub> , median (range), % <sup>†</sup> | 2.8         | 2.6        | 6.3        | 2.2        | 2.0        | 2.3        |
|                     | (0.0–10.7)                                         | (2.1–2.9)   | (5.4–6.6)  | (0.0–10.7) |            | (2.0–7.1)  |            |
|                     | Investigations with abnormal LCI, n (%)            | 1 (7.1)     | 0 (0.0)    | 0 (0.0)    | 0 (0.0)    | 0 (0.0)    | 1 (33.3)   |
| CF                  | Number of children                                 | 49          | 3          | 13         | 17         | 8          | 8          |
|                     | LCI, median (range)                                | 8.2         | 9.7        | 8.1        | 8.2        | 8.3        | 8.4        |
|                     |                                                    | (6.7–15.5)* | (6.9–11.3) | (7.2–9.4)  | (6.7–10.8) | (6.8–11.5) | (7.3–15.5) |
|                     | LCI <sub>CV</sub> , median (range), %              | 4.2         | 2.1        | 3.6        | 4.3        | 5.0        | 3.8        |
|                     | (0.3–17.1)                                         | (1.9–8.9)   | (0.3–8.6)  | (1.2–8.8)  | (2.8–8.5)  | (0.7–17.1) |            |
|                     | Investigations with abnormal LCI, n (%)            | 23 (46.9)*  | 2 (66.7)   | 5 (38.5)   | 7 (41.2)   | 4 (50.0)   | 5 (62.5)   |
| Other lung diseases | Number of children                                 | 12          | 10         |            | 1          |            | 1          |
|                     | LCI, median (range) <sup>†</sup>                   | 7.9         | 7.2        |            | 13.9       |            | 11.1       |
|                     |                                                    | (6.6–13.9)  | (6.6–10.7) |            |            |            |            |
|                     | LCI <sub>CV</sub> , median (range), % <sup>†</sup> | 2.6         | 2.6        |            | 1.0        |            | 5.2        |
|                     | (0.6–8.4)                                          | (0.6–8.4)   |            |            |            |            |            |
|                     | Investigations with abnormal LCI, n (%)            | 6 (50.0)*   | 4 (40.0)   |            | 1 (100.0)  |            | 1 (100.0)  |

Definition of abbreviations: LCI, lung clearance index. CF, cystic fibrosis. CV, coefficient of variation. ARCN, CF Center at Airway Research Center North. BREATH, CF Center at Biomedical Research in Endstage and Obstructive Lung Disease Hannover. TLRC, CF Center at Translational

Lung Research Center Heidelberg. UGMLC, CF Center at Universities of Giessen and Marburg Lung Center. Berlin, CF Center at Charité -  
Universitätsmedizin Berlin. \* $P < 0.01$  vs. control. †In case of a single investigation, the result of this investigation is reported without range.
